# Supplementary material for: Interface engineering in core–shell Co9S8@MoS2 nanocrystals induces enhanced hydrogen evolution in acidic and alkaline media
Source: Royal Society of Chemistry journal article supplement (doi:10.1039/d1nj01221e), 2021-01-01
Supplement: d1nj01221e1.pdf [file d1nj01221e1.pdf]

## Supporting Information

**Interface engineering in core-shell  $\text{Co}_9\text{S}_8@\text{MoS}_2$  nanocrystals induces enhanced hydrogen evolution in acidic and alkaline media**

Jiace Hao, Hongyin Hu, Yuan Dong, Jingwen Hu, Xinxin Sang, Fang Duan, Shuanglong Lu, Han Zhu\*, Mingliang Du

Key Laboratory of Synthetic and Biological Colloids, Ministry of Education, School of Chemical and Material Engineering, Jiangnan University, Wuxi 214122, P. R. China

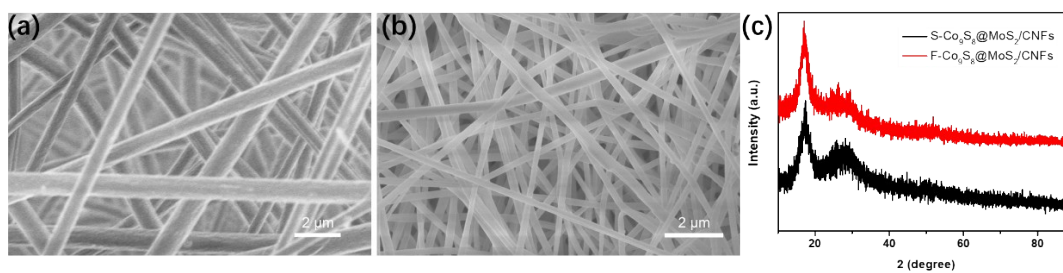

**Figure S1.** SEM images of PAN/CoMo precursor nanofibers of F-Co<sub>9</sub>S<sub>8</sub>@MoS<sub>2</sub>/CNFs (a) and S-Co<sub>9</sub>S<sub>8</sub>@MoS<sub>2</sub>/CNFs (b). (c) XRD patterns of PAN/CoMo precursor nanofibers of F-Co<sub>9</sub>S<sub>8</sub>@MoS<sub>2</sub>/CNFs and S-Co<sub>9</sub>S<sub>8</sub>@MoS<sub>2</sub>/CNFs.

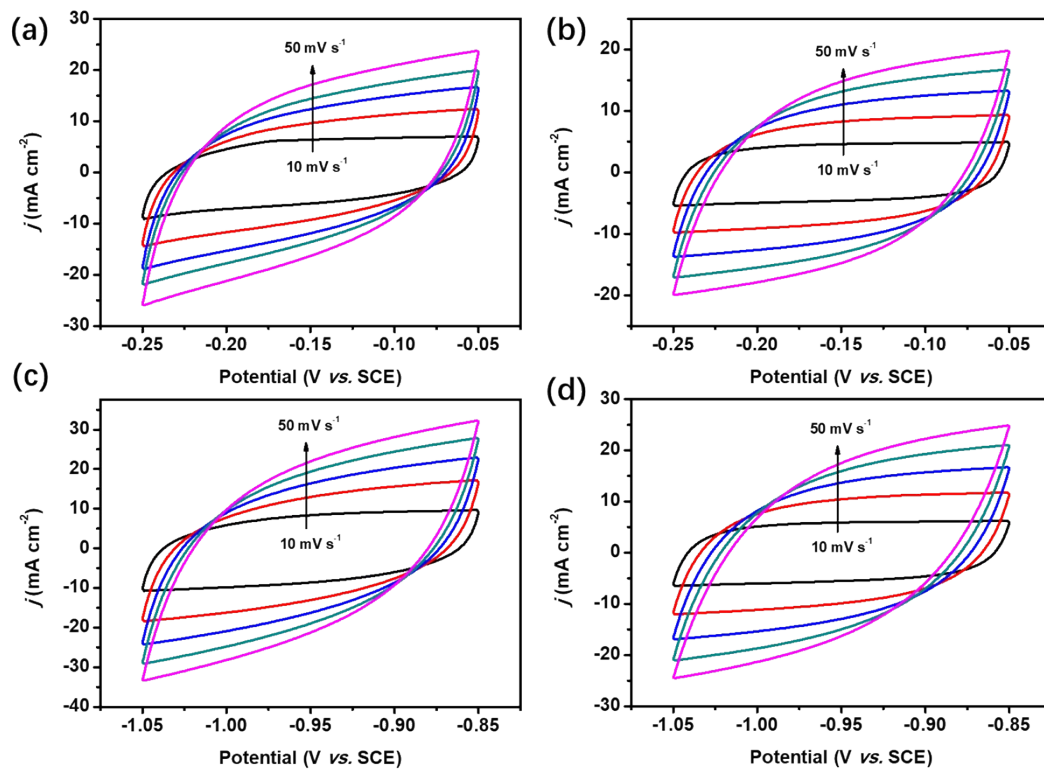

**Figure S2.** Electrochemical cyclic voltammograms curves of S-Co<sub>9</sub>S<sub>8</sub>@MoS<sub>2</sub>/CNFs and F-Co<sub>9</sub>S<sub>8</sub>@MoS<sub>2</sub>/CNFs in 0.5 M H<sub>2</sub>SO<sub>4</sub> (a, b) and 1.0 M KOH (c, d) at scan rates of 10, 20, 30, 40, and 50 mV s<sup>-1</sup>.

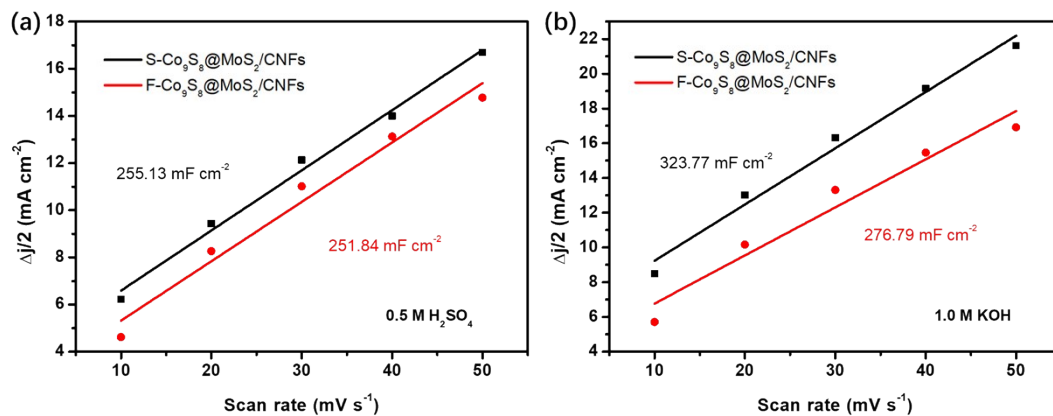

**Figure S3.** Calculation of  $C_{dl}$  by plotting Capacitive currents ( $\Delta j$ ) against scan rates in 0.5 M H<sub>2</sub>SO<sub>4</sub> (a) or 1.0 M KOH (b).

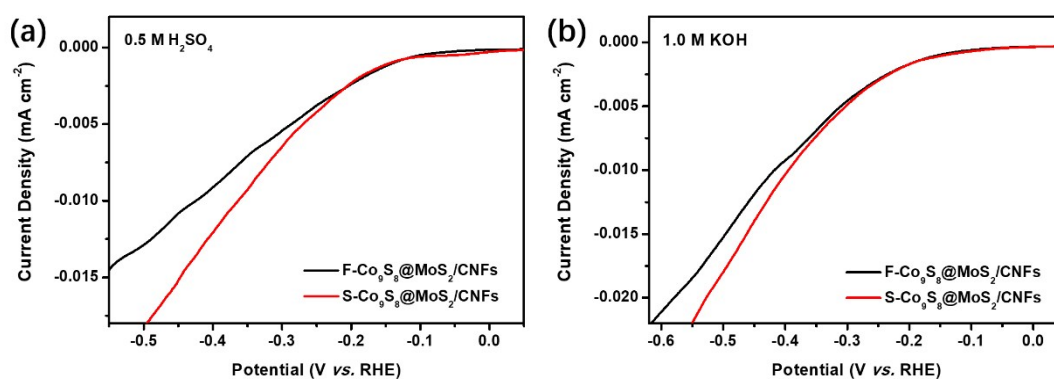

**Figure S4.** Polarization curves of F-Co<sub>9</sub>S<sub>8</sub>@MoS<sub>2</sub>/CNFs and S-Co<sub>9</sub>S<sub>8</sub>@MoS<sub>2</sub>/CNFs normalized by ECSA in 0.5 M H<sub>2</sub>SO<sub>4</sub> (a) or 1.0 M KOH (b).

Table S1. Comparison of sulfide-based electrocatalysts.

| Catalysts                                                  | Electrolyte                          | $\eta_{10}$ (mA cm <sup>-2</sup> ) | $\eta_{100}$ (mA cm <sup>-2</sup> ) | Tafel Slope (mV dec <sup>-1</sup> ) | Reference |
|------------------------------------------------------------|--------------------------------------|------------------------------------|-------------------------------------|-------------------------------------|-----------|
| Co <sub>9</sub> S <sub>8</sub> /MoS <sub>x</sub> nanotubes | 0.5 M H <sub>2</sub> SO <sub>4</sub> | 161                                | /                                   | 78                                  | [1]       |
| Co <sub>9</sub> S <sub>8</sub> @MoS <sub>2</sub> HNBS      | 0.5 M H <sub>2</sub> SO <sub>4</sub> | 106                                | /                                   | 51.8                                | [2]       |
| Co <sub>9</sub> S <sub>8</sub> @MoS <sub>2</sub> hybrids   | 0.5 M H <sub>2</sub> SO <sub>4</sub> | 171                                | /                                   | 123                                 | [3]       |
|                                                            | 1.0 M KOH                            | 143                                | /                                   | 117                                 |           |
| Co <sub>9</sub> S <sub>8</sub> -30@MoS <sub>x</sub> /CC    | 0.5 M H <sub>2</sub> SO <sub>4</sub> | 98                                 | 165                                 | 64.8                                | [4]       |
| MoS <sub>2</sub> /Ni <sub>3</sub> S <sub>2</sub>           | 1.0 M KOH                            | 110                                | /                                   | 83.1                                | [5]       |
| CoMoS-2-C                                                  | 0.5 M H <sub>2</sub> SO <sub>4</sub> | 135                                | /                                   | 50                                  | [6]       |
| Hollow CoS <sub>x</sub> @MoS <sub>2</sub> microcubes       | 0.5 M H <sub>2</sub> SO <sub>4</sub> | 239                                | /                                   | 103                                 | [7]       |
|                                                            | 0.5 M H <sub>2</sub> SO <sub>4</sub> | 117                                | /                                   | 68.8                                |           |
| Co <sub>9</sub> S <sub>8</sub> /NC@MoS <sub>2</sub>        | 1.0 M KOH                            | 67                                 | /                                   | 60.3                                | [8]       |
|                                                            | 1.0 M PBS                            | 261                                | /                                   | 126.1                               |           |
|                                                            | 0.5 M H <sub>2</sub> SO <sub>4</sub> | 230                                | /                                   | 111.7                               |           |
| Co <sub>9</sub> S <sub>8</sub> -MoS <sub>2</sub> @3DC      | 1.0 M KOH                            | 177                                | /                                   | 83.6                                | [9]       |
|                                                            | 1.0 M PBS                            | 474                                | /                                   | 172                                 |           |
| Co <sub>9</sub> S <sub>8</sub> /1L MoS <sub>2</sub>        | 0.5 M H <sub>2</sub> SO <sub>4</sub> | 97                                 | /                                   | 71                                  | [10]      |
| Co <sub>9</sub> S <sub>8</sub> /CNFs                       | 0.5 M H <sub>2</sub> SO <sub>4</sub> | 165                                | /                                   | 83                                  | [11]      |
| Pd <sub>16</sub> S <sub>7</sub> /MoS <sub>2</sub> /CNFs    | 0.5 M H <sub>2</sub> SO <sub>4</sub> | 83                                 | /                                   | 113                                 | [12]      |
| Co <sub>9</sub> S <sub>8</sub> @MoS <sub>2</sub> /CNFs     | 0.5 M H <sub>2</sub> SO <sub>4</sub> | 190                                | /                                   | 110                                 | [13]      |
| Co <sub>9</sub> S <sub>8</sub> HMs-140/C                   | 0.1 M KOH                            | 250                                | /                                   | 98                                  | [14]      |
| Co <sub>9</sub> S <sub>8</sub> /HWS <sub>2</sub> /CNFs     | 0.5 M H <sub>2</sub> SO <sub>4</sub> | 83                                 | 235                                 | 56                                  | [15]      |
|                                                            | 1.0 M KOH                            | 87                                 | 375                                 | 72                                  |           |
| S-Co <sub>9</sub> S <sub>8</sub> @ MoS <sub>2</sub> /CNFs  | 0.5 M H <sub>2</sub> SO <sub>4</sub> | 77                                 | 236                                 | 83                                  | This work |
|                                                            | 1.0 M KOH                            | 122                                | 322                                 | 66                                  |           |

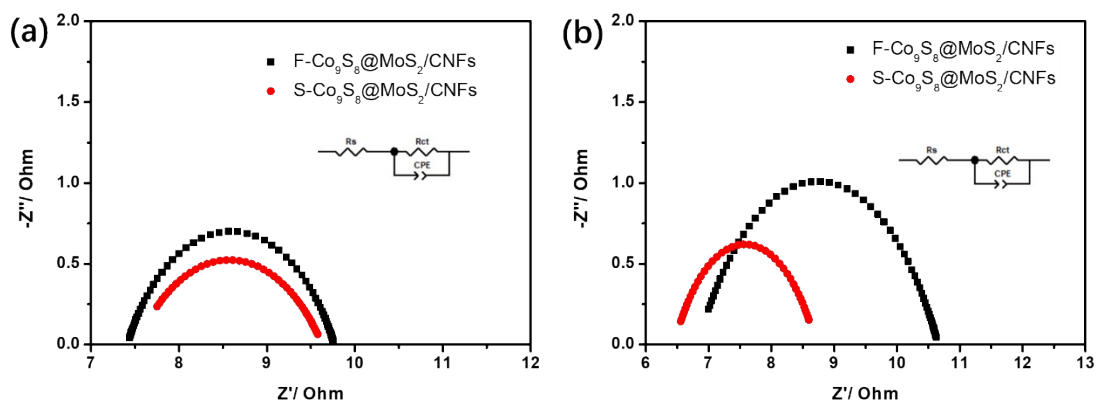

**Figure S5.** The Nyquist plots of F-Co<sub>9</sub>S<sub>8</sub>@MoS<sub>2</sub>/CNFs and S-Co<sub>9</sub>S<sub>8</sub>@MoS<sub>2</sub>/CNFs in 0.5 M H<sub>2</sub>SO<sub>4</sub> (a) and 1.0 M KOH (b) at  $\eta = 10$  mV.

**Table S2.**  $R_{ct}$  values of F-Co<sub>9</sub>S<sub>8</sub>@MoS<sub>2</sub>/CNFs and S-Co<sub>9</sub>S<sub>8</sub>@MoS<sub>2</sub>/CNFs in 0.5 M H<sub>2</sub>SO<sub>4</sub> and 1.0 M KOH at  $\eta = 10$  mV.

| $R_{ct}$                             | F-Co <sub>9</sub> S <sub>8</sub> @MoS <sub>2</sub> /CNFs | S-Co <sub>9</sub> S <sub>8</sub> @MoS <sub>2</sub> /CNFs |
|--------------------------------------|----------------------------------------------------------|----------------------------------------------------------|
| 0.5 M H <sub>2</sub> SO <sub>4</sub> | 2.36                                                     | 2.11                                                     |
| 1.0 M KOH                            | 3.83                                                     | 2.26                                                     |

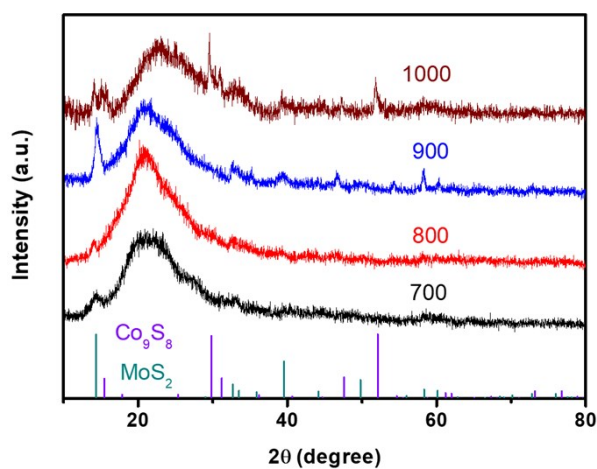

**Figure S6.** XRD patterns of the S-Co<sub>9</sub>S<sub>8</sub>@MoS<sub>2</sub>/CNFs prepared at different temperatures.

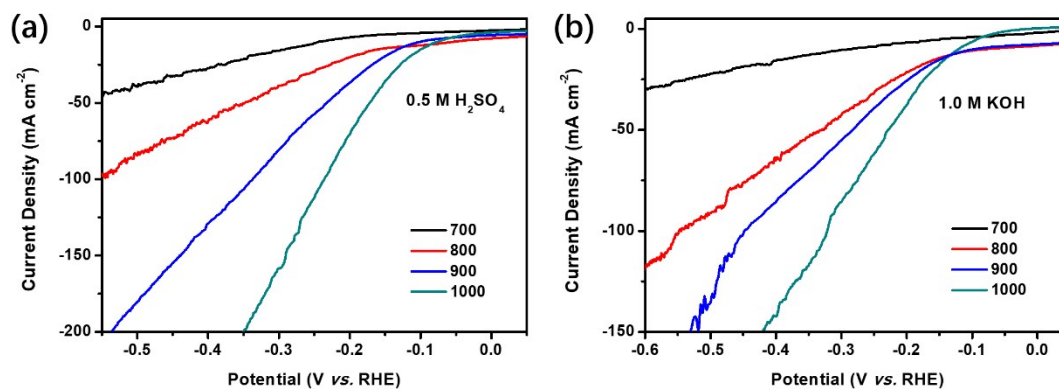

**Figure S7.** HER LSV curves of S-Co<sub>9</sub>S<sub>8</sub>@MoS<sub>2</sub>/CNFs prepared at different temperatures obtained in (a) 0.5 M H<sub>2</sub>SO<sub>4</sub> and (b) 1.0 M KOH.

## References

- [1] L. Wu, K. Zhang, T. Wang, X. Xu, Y. Zhao, Y. Sun, W. Zhong, Y. Du, Cobalt sulfide nanotubes ( $\text{Co}_9\text{S}_8$ ) decorated with amorphous  $\text{MoS}_x$  as highly efficient hydrogen evolution electrocatalyst, *ACS Appl. Nano Mater.* 1 (2018) 1083–1093. <https://doi.org/10.1021/acsanm.7b00271>
- [2] V. Ganesan, S. Lim, J. Kim, Hierarchical nanoboxes composed of  $\text{Co}_9\text{S}_8$ @ $\text{MoS}_2$  nanosheets as efficient electrocatalysts for the hydrogen evolution reaction, *Chem. Asian J.* 13 (2018) 413–420. <https://doi.org/10.1002/asia.201701536>
- [3] J. Bai, T. Meng, D. Guo, S. Wang, B. Mao, M. Cao,  $\text{Co}_9\text{S}_8$ @ $\text{MoS}_2$  core–shell heterostructures as trifunctional electrocatalysts for overall water splitting and Zn–air batteries, *ACS Appl. Mater. Interfaces* 10 (2018) 1678–1689. <https://doi.org/10.1021/acscami.7b14997>
- [4] X. Zhou, X. Yang, M. Hedhili, H. Li, S. Min, J. Ming, K. Huang, W. Zhang, L. Li, Symmetrical synergy of hybrid  $\text{Co}_9\text{S}_8$ - $\text{MoS}_x$  electrocatalysts for hydrogen evolution reaction, *Nano Energy* 32 (2017) 470–478. <https://doi.org/10.1016/j.nanoen.2017.01.011>
- [5] J. Zhang, T. Wang, D. Pohl, B. Rellinghaus, R. Dong, S. Liu, X.D. Zhuang, X.L. Feng, Interface engineering of  $\text{MoS}_2$ / $\text{Ni}_3\text{S}_2$  heterostructures for highly enhanced electrochemical overall-water-splitting activity, *Angew. Chem.* 55 (2016) 6702–6707. <https://doi.org/10.1002/anie.201602237>
- [6] X. Dai, K. Du, Z. Li, M. Liu, Y. Ma, H. Sun, X. Zhang, Y. Yang, Co-doped  $\text{MoS}_2$  nanosheets with the dominant CoMoS phase coated on carbon as an excellent electrocatalyst for hydrogen evolution, *ACS Appl. Mater. Interfaces* 7 (2015) 27242–27253. <https://doi.org/10.1021/acscami.5b08420>
- [7] L. Yang, L. Zhang, G. Xu, X. Ma, W. Wang, H. Song, D. Jia, Metal–organic-framework-derived hollow  $\text{CoS}_x$ @ $\text{MoS}_2$  microcubes as superior bifunctional electrocatalysts for hydrogen evolution and oxygen evolution reactions, *ACS Sustainable Chem. Eng.* 6 (2018) 12961–12968. <https://doi.org/10.1021/acssuschemeng.8b02428>
- [8] H. Li, X. Qian, C. Xu, S. Huang, C. Zhu, X. Jiang, L. Shao, L. Hou, Hierarchical porous  $\text{Co}_9\text{S}_8$ /nitrogen-doped carbon@ $\text{MoS}_2$  polyhedrons as pH universal electrocatalysts for highly efficient hydrogen evolution reaction, *ACS Appl. Mater. Interfaces* 9 (2017) 28394–28405. <https://doi.org/10.1021/acscami.7b06384>
- [9] L. Diao, B. Zhang, Q. Sun, N. Wang, N. Zhao, C. Shi, E. Liu, C. He, An in-plane  $\text{Co}_9\text{S}_8$ @ $\text{MoS}_2$  heterostructure for the hydrogen evolution reaction in alkaline media, *Nanoscale* 11 (2019) 21479–21486. <https://doi.org/10.1039/C9NR06609H>
- [10] H. Zhu, G. Gao, M. Du, J. Zhou, K. Wang, W. Wu, X. Chen, Y. Li, P. Ma, W. Dong, F. Duan, M. Chen, G. Wu, J. Wu, H. Yang, S. Guo, Atomic-scale core/shell structure engineering induces precise tensile strain to boost hydrogen evolution catalysis, *Adv. Mater.* 30 (2018) 1707301. <https://doi.org/10.1002/adma.201707301>
- [11] L. Gu, H. Zhu, D. Yu, S. Zhang, J. Chen, J. Wang, M. Wan, M. Zhang, M. Du, A facile strategy to synthesize cobalt-based self-supported material for electrocatalytic water splitting, *Part. Part. Syst. Charact.* 34 (2017) 1700189. <https://doi.org/10.1002/ppsc.201700189>
- [12] Y. Wen, H. Zhu, L. Zhang, J. Hao, C. Wang, S. Zhang, S. Lu, M. Zhang, M. Du, Beyond colloidal synthesis: Nanofiber reactor to design self-supported core–shell  $\text{Pd}_{16}\text{S}_7$ / $\text{MoS}_2$ /CNFs electrode for efficient and durable hydrogen evolution catalysis, *ACS Appl. Energy Mater.* 2 (2019) 2013–2021. <https://doi.org/10.1021/acsaem.8b02105>



- [13] H. Zhu, J. Zhang, R. Yanzhang, M. Du, Q. Wang, G. Gao, J. Wu, G. Wu, M. Zhang, B. Liu, J. Yao, X. Zhang, When cubic cobalt sulfide meets layered molybdenum disulfide: A core–shell system toward synergetic electrocatalytic water splitting, *Adv. Mater.* 27 (2015) 4752-4759. <https://doi.org/10.1002/adma.201501969>
- [14] Y. Zhang, S. Chao, X. Wang, H. Han, Z. Bai, L. Yang, Hierarchical Co<sub>9</sub>S<sub>8</sub> hollow microspheres as multifunctional electrocatalysts for oxygen reduction, oxygen evolution and hydrogen evolution reactions, *Electrochim. Acta* 246 (2017) 380-390. <https://doi.org/10.1016/j.electacta.2017.06.058>
- [15] S. Zhang, Y. Li, H. Zhu, S. Lu, P. Ma, W. Dong, F. Duan, M. Chen, M. Du, Understanding the role of nanoscale heterointerfaces in core/shell structures for water splitting: Covalent bonding interaction boosts the activity of binary transition-metal sulfides, *ACS Appl. Mater. Interfaces* 12 (2020) 6250–6261. <https://doi.org/10.1021/acsami.9b19382>
